# Supplementary material for: Blockade of interleukin 10 potentiates antitumour immune function in human colorectal cancer liver metastases
Source: HighWire-hosted journal article supplement (doi:10.1136/gutjnl-2021-325808), 2022-06-15

## S1

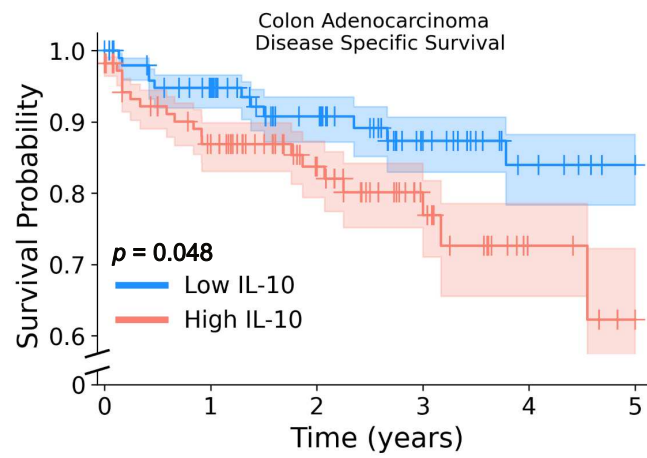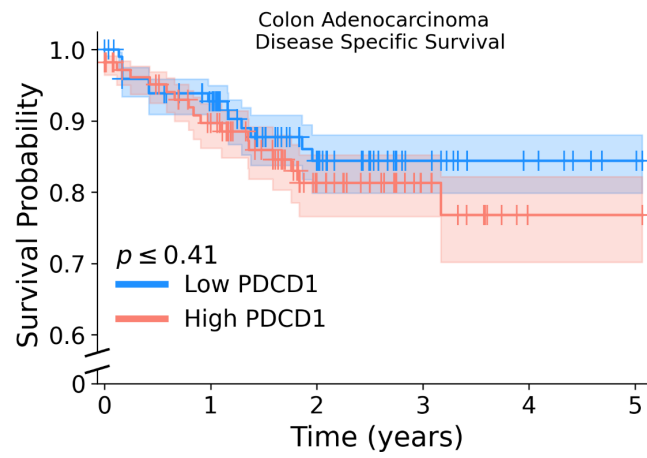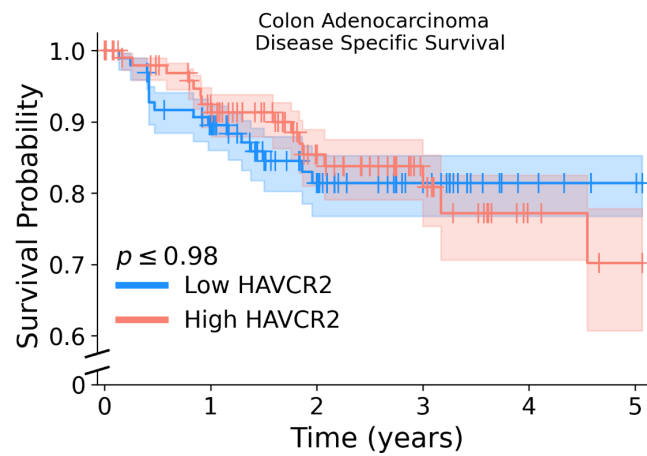

**S2A**

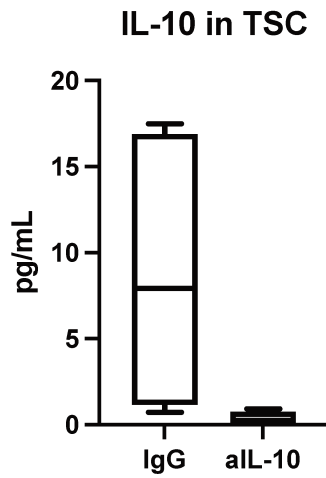

**S2B**

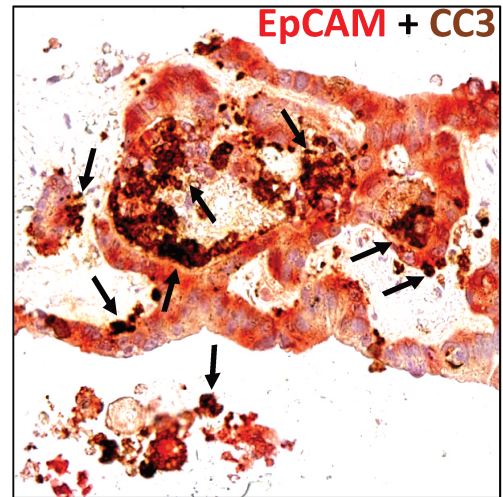

**S2C**

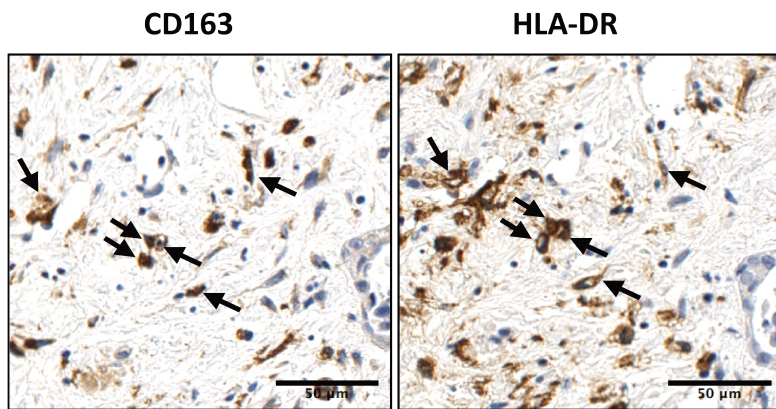

**S2D**

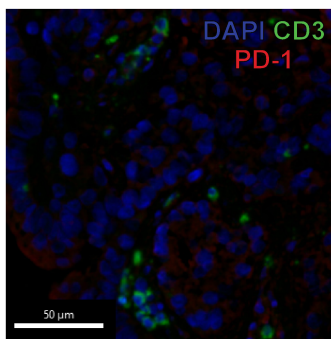

**Control**

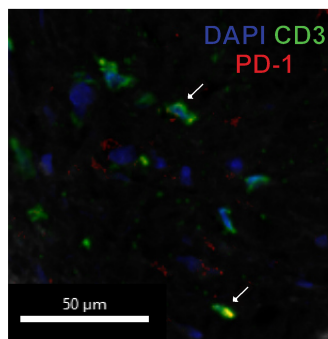

**aIL10**

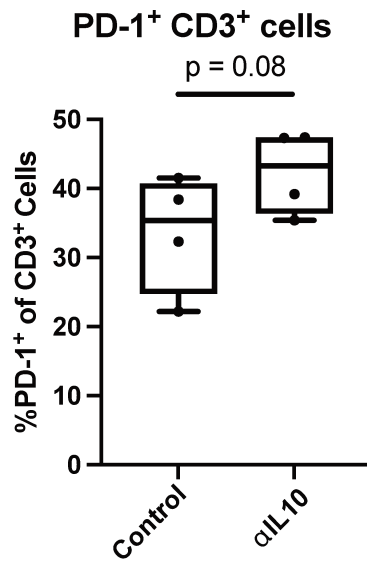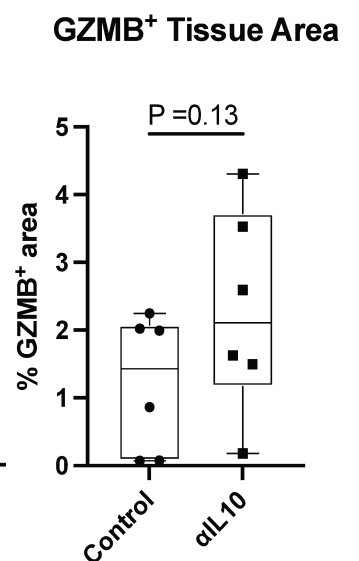

## S3

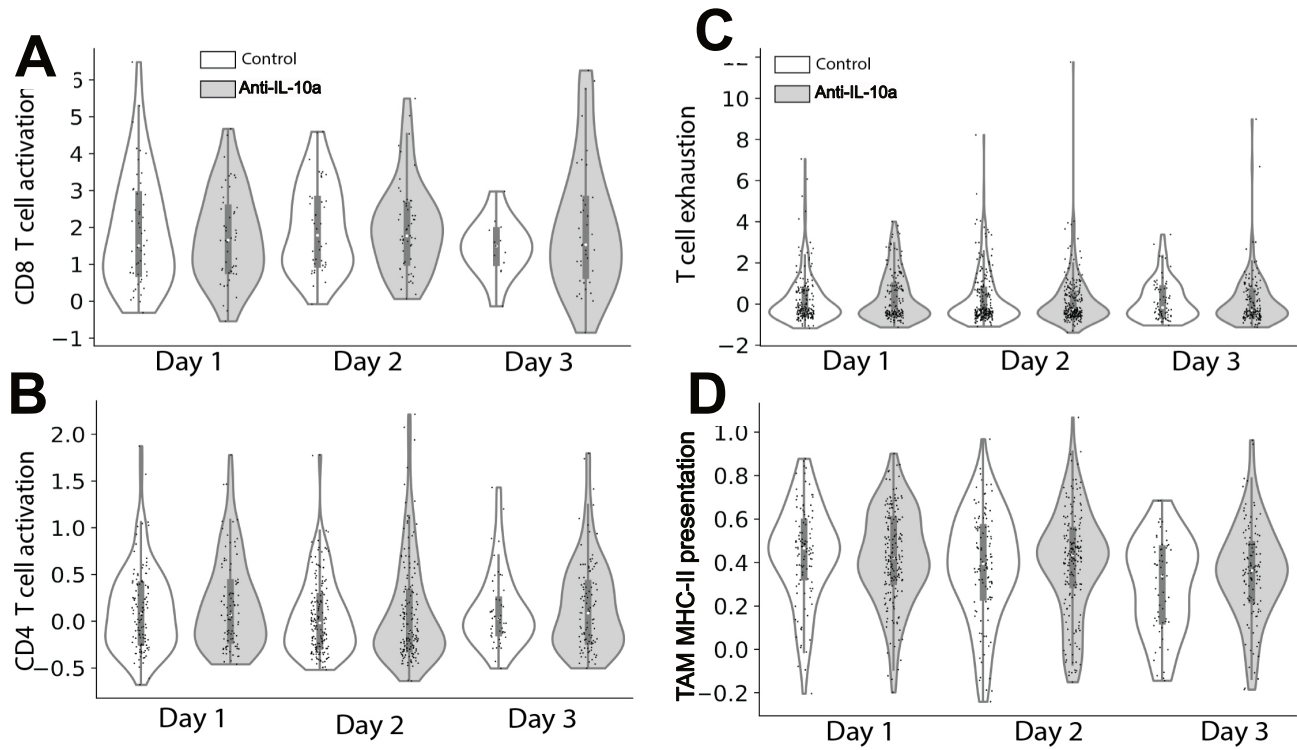

**S4****Carcinoma cells with adjacent CAR-T cell**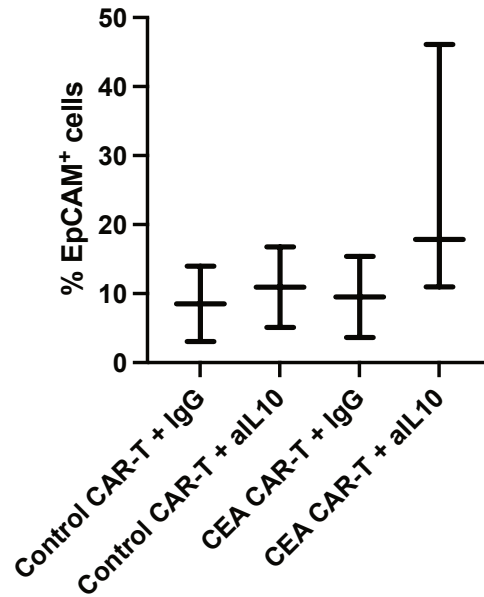**Total apoptotic carcinoma cells**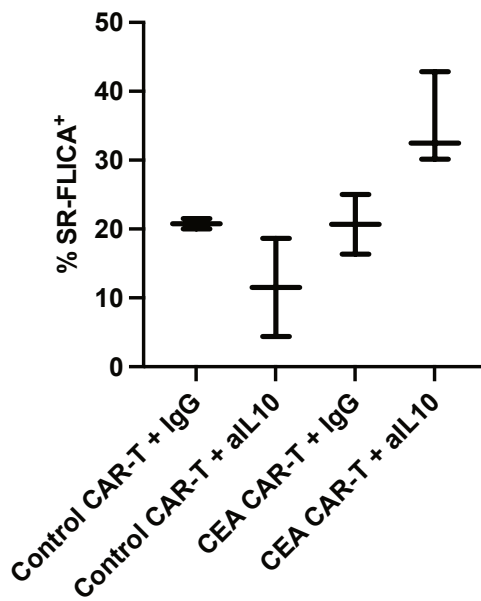**Apoptotic carcinoma cells with CAR-T adjacent**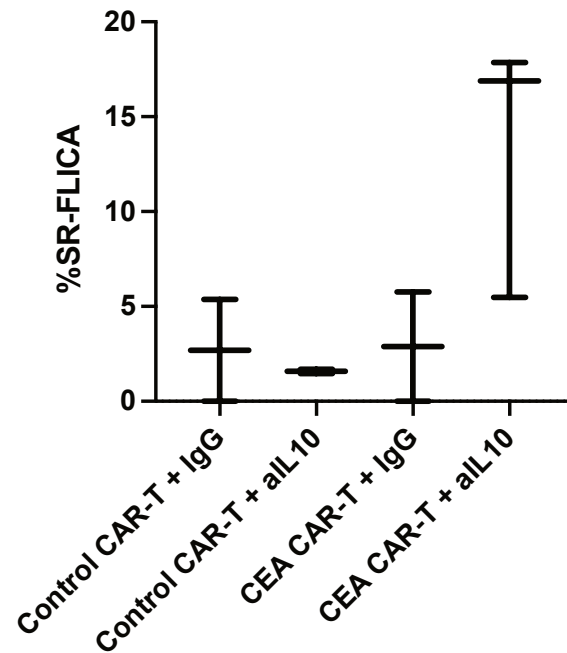

Treatment

# S5

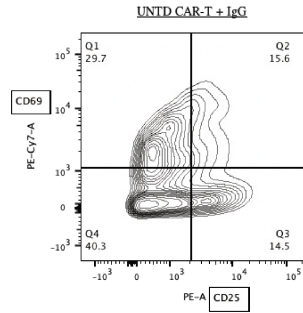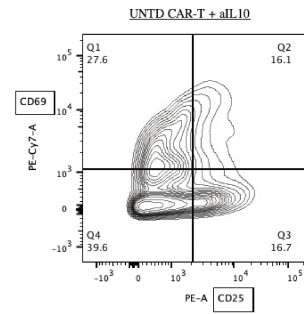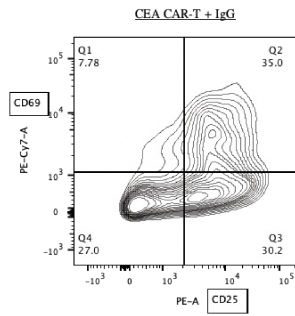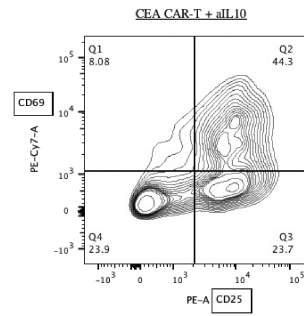

Supplement: gutjnl-2021-325808supp002_data_supplement.pdf [file gutjnl-2021-325808supp002_data_supplement.pdf]
