# Supplementary figures and images for: Blockade of interleukin 10 potentiates antitumour immune function in human colorectal cancer liver metastases
Source: PubMed Central journal article supplement — Gut. Author manuscript; Available in PMC 2023 Feb 1. (PMC9872249; doi:10.1136/gutjnl-2021-325808), 2022-06-15

S1

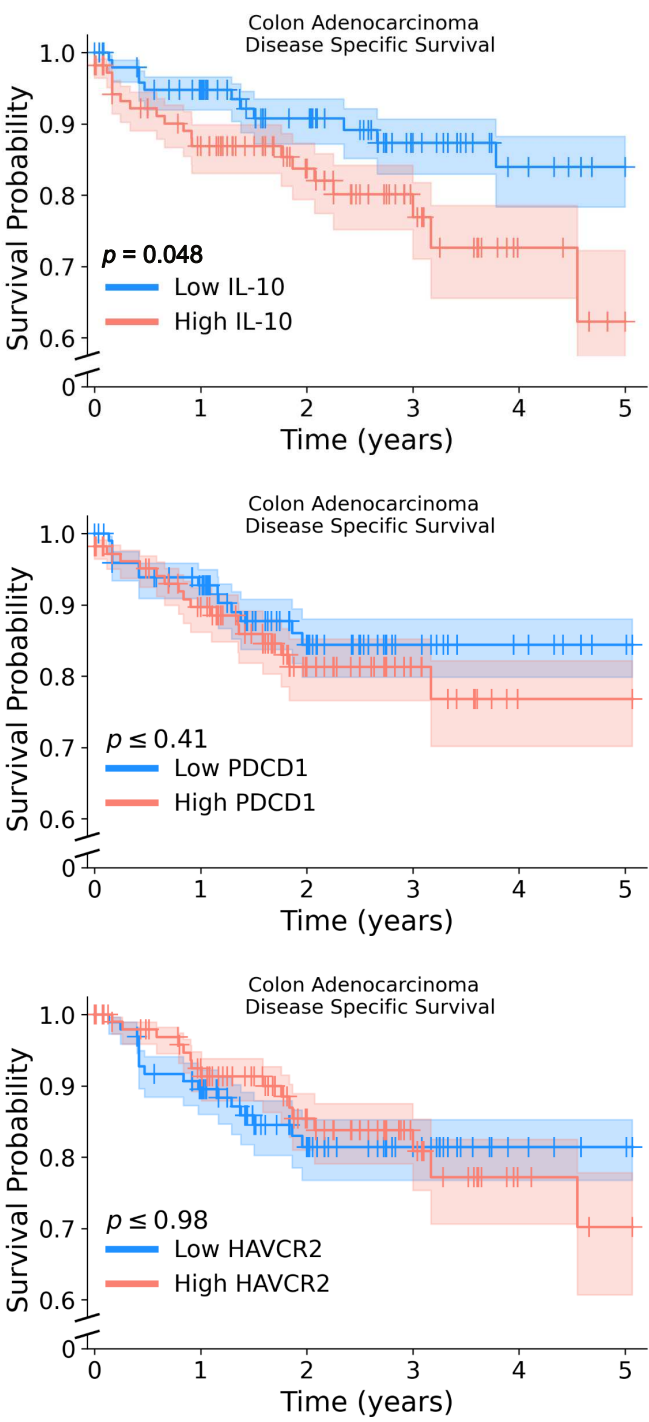

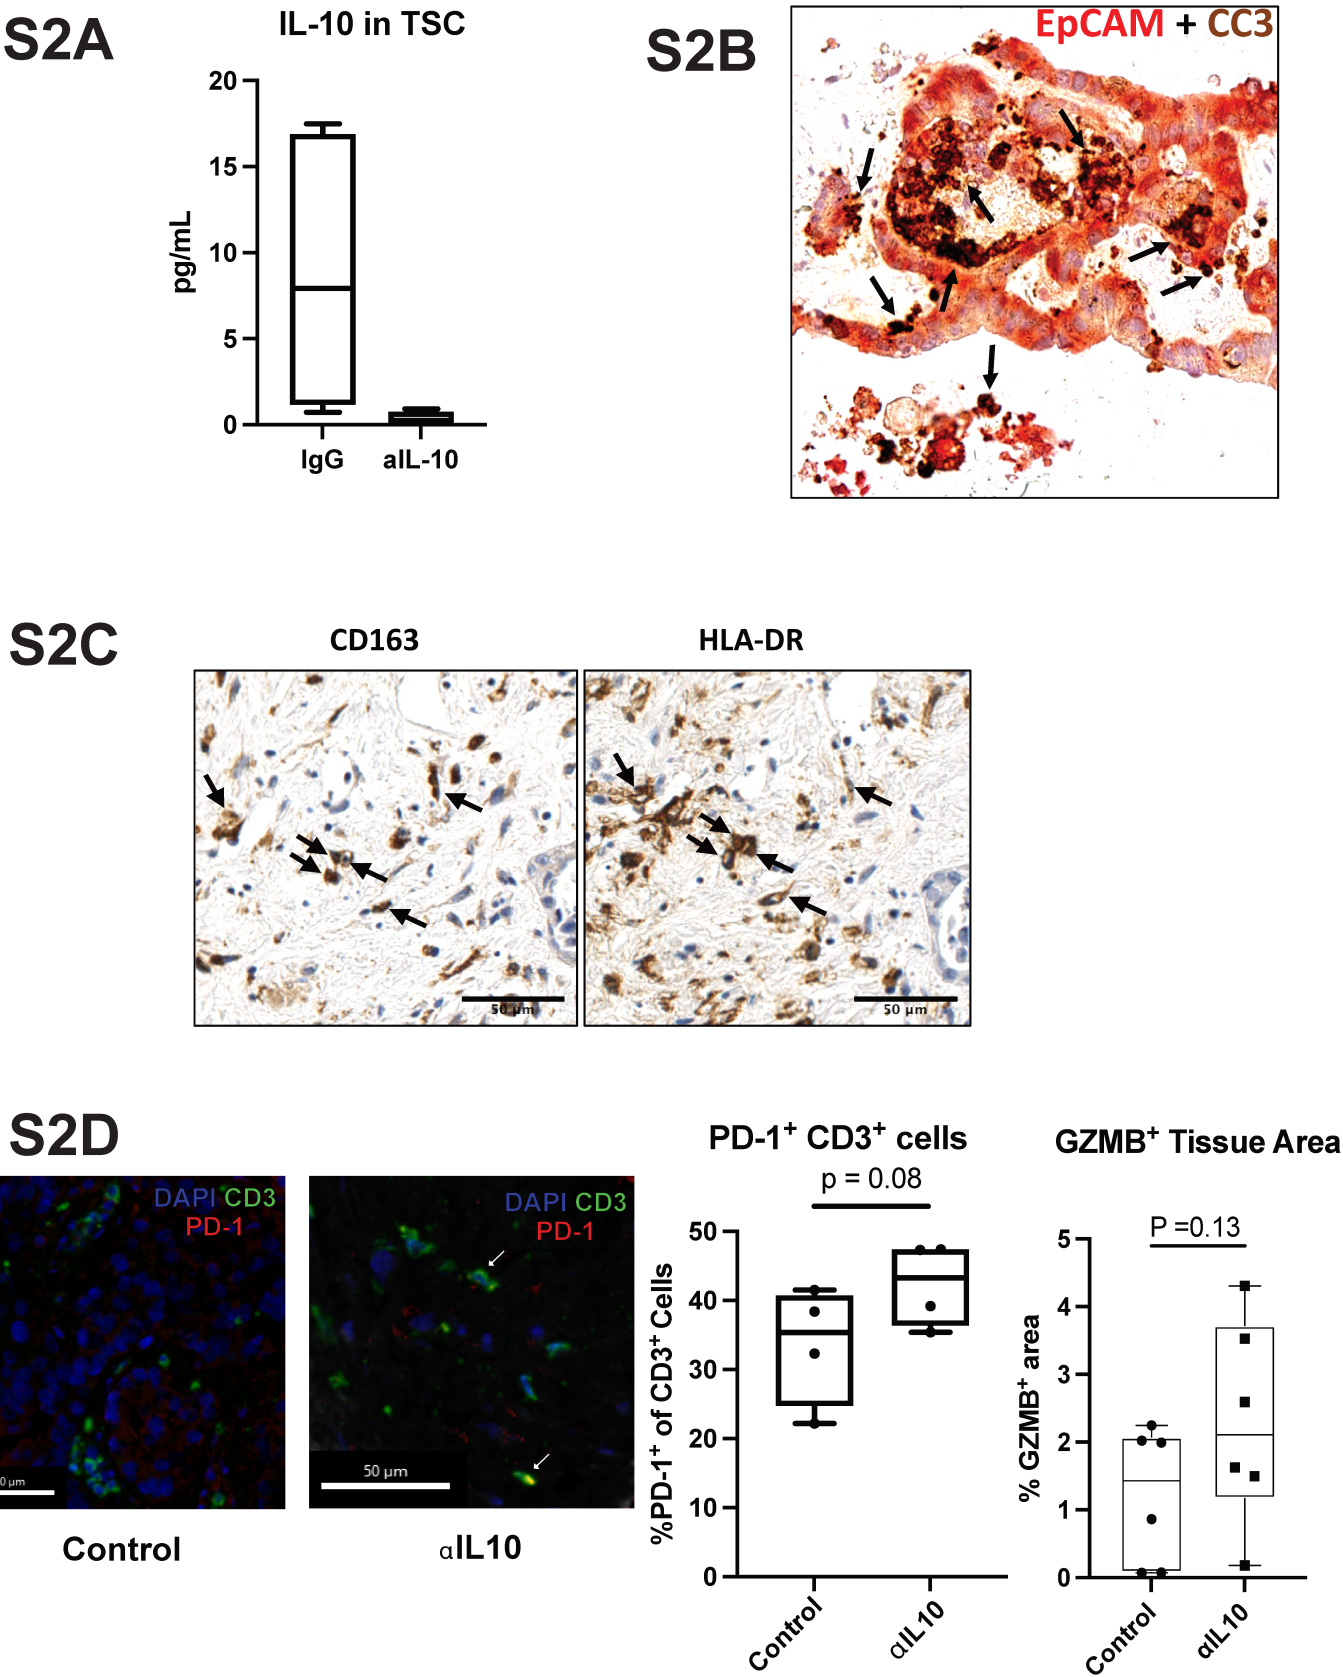

S3

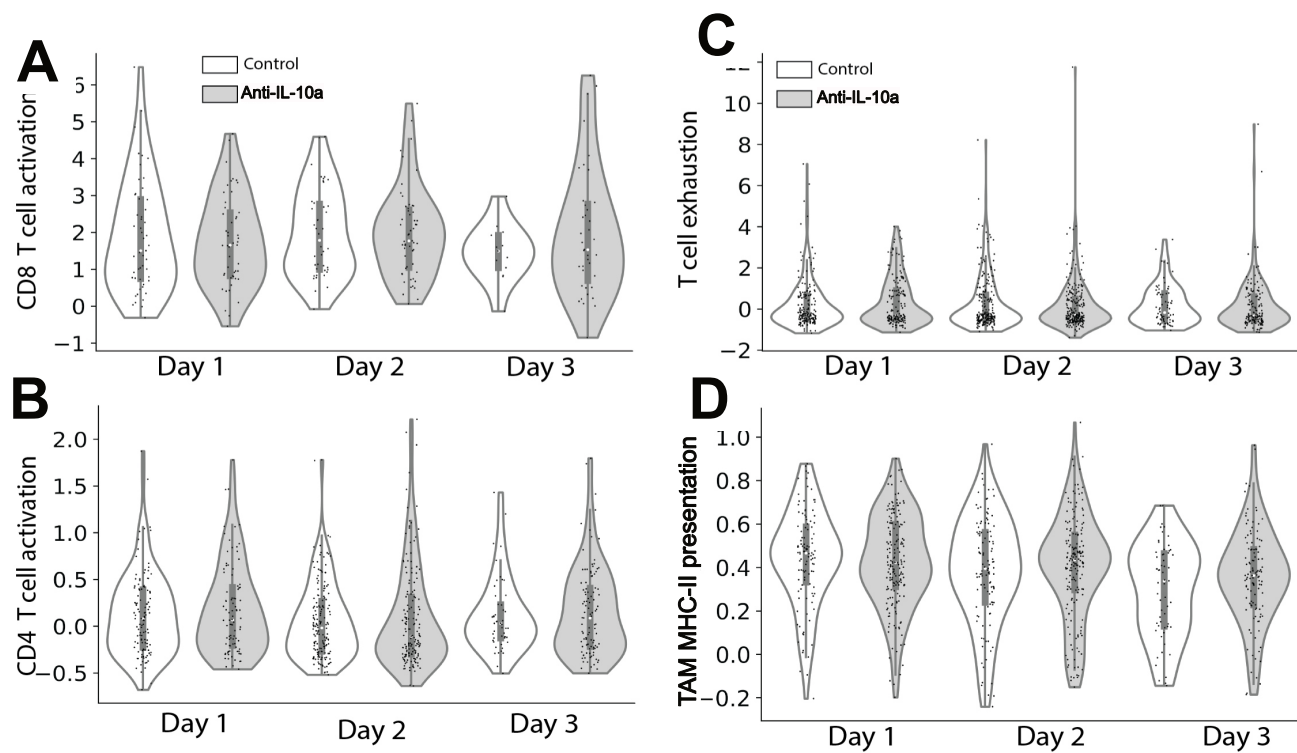

S4

Carcinoma cells with adjacent CAR-T cell

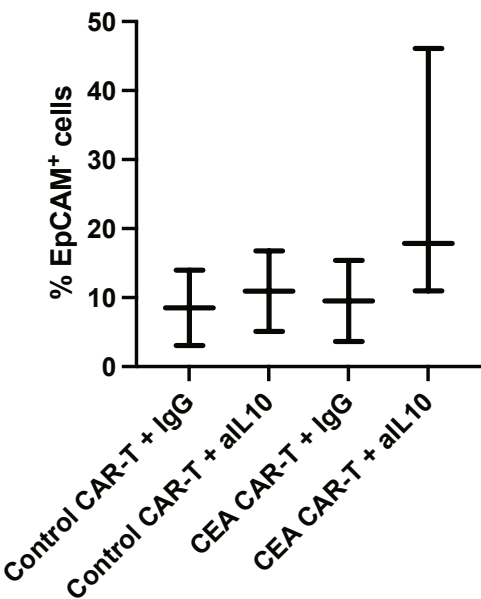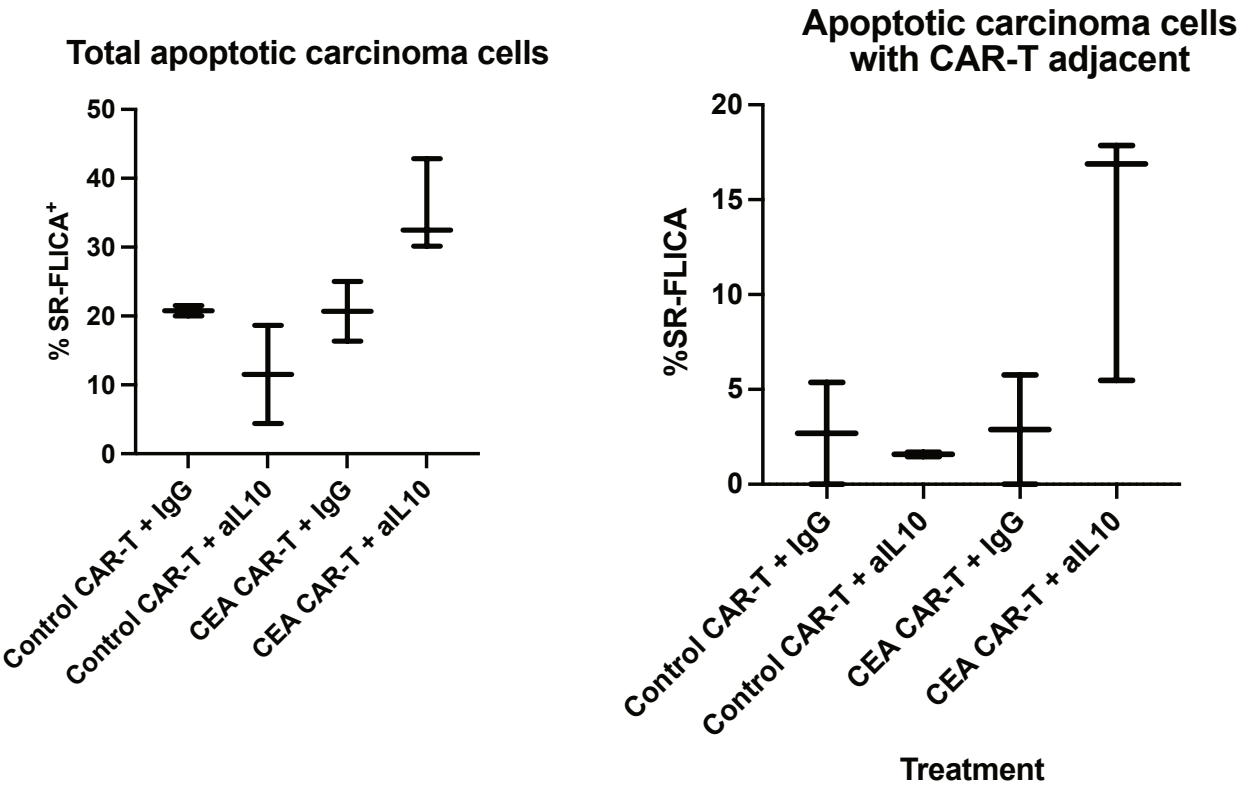

S5

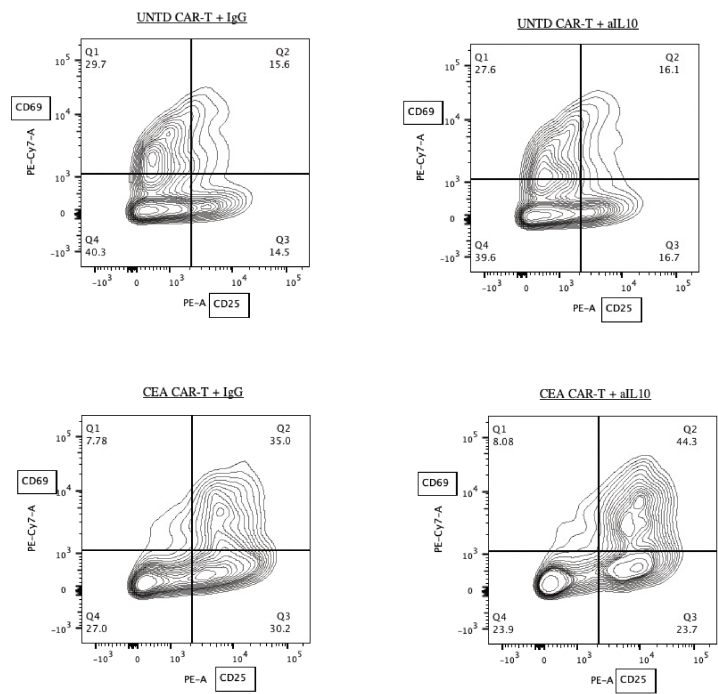

Supplement: gutjnl-2021-325808supp002.pdf [file gutjnl-2021-325808supp002.pdf]
